# Supplementary material for: Modeling biochar effects on soil organic carbon on croplands in a microbial decomposition model (MIMICS-BC_v1.0)
Source: Copernicus journal article supplement (doi:10.5194/gmd-17-4871-2024), 2024-06-20
Supplement: Supplementary file 1 [file gmd-17-4871-2024-supplement.pdf]

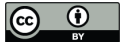

*Supplement of*

**Modeling biochar effects on soil organic carbon on croplands in a microbial decomposition model (MIMICS-BC\_v1.0)**

**Mengjie Han et al.**

*Correspondence to:* Wei Li ([wli2019@tsinghua.edu.cn](mailto:wli2019@tsinghua.edu.cn))

The copyright of individual parts of the supplement might differ from the article licence.

# Supporting information

**Table S1** Definitions, values and units of parameters in MIMICS.

| Parameter                                 | Description                                             | Value                                                                                                                                                      | Unit                                                               |
|-------------------------------------------|---------------------------------------------------------|------------------------------------------------------------------------------------------------------------------------------------------------------------|--------------------------------------------------------------------|
| <b>Carbon pools</b>                       |                                                         |                                                                                                                                                            |                                                                    |
| $LIT_m$                                   | Metabolic litter pool                                   | -                                                                                                                                                          | mg C cm <sup>-3</sup>                                              |
| $LIT_s$                                   | Structural litter pool                                  | -                                                                                                                                                          | mg C cm <sup>-3</sup>                                              |
| $MIC_r$                                   | Microorganism with copiotrophic growth strategy         | -                                                                                                                                                          | mg C cm <sup>-3</sup>                                              |
| $MIC_k$                                   | Microorganism with oligotrophic growth strategy         | -                                                                                                                                                          | mg C cm <sup>-3</sup>                                              |
| $SOC_p$                                   | Physically-protected SOC pool                           | -                                                                                                                                                          | mg C cm <sup>-3</sup>                                              |
| $SOC_c$                                   | Chemical protected SOC pool                             | -                                                                                                                                                          | mg C cm <sup>-3</sup>                                              |
| $SOC_a$                                   | Available SOC pool                                      | -                                                                                                                                                          | mg C cm <sup>-3</sup>                                              |
| <b>Litter input parameters</b>            |                                                         |                                                                                                                                                            |                                                                    |
| $f_{met}$                                 | Partitioning of litter inputs to $LIT_m$                | 0.85-0.013 (lignin/N)                                                                                                                                      | -                                                                  |
| $f_{i,met}$                               | Fraction of litter inputs transferred to $SOC_p$        | 0.05                                                                                                                                                       | -                                                                  |
| $f_{i,STRU}$                              | Fraction of litter inputs transferred to $SOC_c$        | 0.05                                                                                                                                                       | -                                                                  |
| <b>Microbial decomposition parameters</b> |                                                         |                                                                                                                                                            |                                                                    |
| $V_{max}$                                 | Microbial maximum reaction velocity                     | -                                                                                                                                                          | mg C (mg MIC) <sup>-1</sup> h <sup>-1</sup>                        |
| $K_m$                                     | Half-saturation constant                                | -                                                                                                                                                          | mg C cm <sup>-3</sup>                                              |
| $V_{slope}$                               | Regression coefficient (Eq. 2)                          | 0.063 <sup>a</sup>                                                                                                                                         | ln (mg C (mg MIC) <sup>-1</sup> h <sup>-1</sup> ) °C <sup>-1</sup> |
| $V_{int}$                                 | Regression intercept (Eq. 2)                            | 5.47 <sup>a</sup>                                                                                                                                          | ln (mg C (mg MIC) <sup>-1</sup> h <sup>-1</sup> )                  |
| $av$                                      | Tuning coefficient (Eq. 2)                              | 8×10 <sup>-6</sup> <sup>a</sup>                                                                                                                            | -                                                                  |
| $V_{mod-r}$                               | Modifies $V_{max}$ for fluxes into $MIC_r$              | 10, 2, 10 <sup>b</sup>                                                                                                                                     | -                                                                  |
| $V_{mod-k}$                               | Modifies $V_{max}$ for fluxes into $MIC_k$              | 3,3,2 <sup>c</sup>                                                                                                                                         | -                                                                  |
| $K_{slope}$                               | Regression coefficient (Eq. 3)                          | 0.017, 0.027, 0.017 <sup>b,c</sup>                                                                                                                         | ln (mg C cm <sup>-3</sup> ) °C <sup>-1</sup>                       |
| $K_{int}$                                 | Regression intercept (Eq. 3)                            | 3.19 <sup>a</sup>                                                                                                                                          | ln (mg C cm <sup>-3</sup> )                                        |
| $ak$                                      | Tuning coefficient (Eq. 3)                              | 10 <sup>a</sup>                                                                                                                                            | -                                                                  |
| $K_{mod-r}$                               | Modifies $K_m$ for fluxes into $MIC_r$                  | 0.125,0.5,0.25× $P_{scalar}$ <sup>b</sup>                                                                                                                  | -                                                                  |
| $K_{mod-k}$                               | Modifies $K_m$ for fluxes into $MIC_k$                  | 0.5,0.25,0.167× $P_{scalar}$ <sup>c</sup>                                                                                                                  | -                                                                  |
| $P_{scalar}$                              | Physical protection scalar used in $K_{mod}$            | (2.0 × (2.0 × e <sup>-2√fclay</sup> )) <sup>-1</sup>                                                                                                       | -                                                                  |
| $MGE$                                     | Microbial growth efficiency                             | 0.5,0.25,0.7,0.35 <sup>d</sup>                                                                                                                             | mg mg <sup>-1</sup>                                                |
| $k_{mic}$                                 | Microbial biomass turnover rate                         | 5.2 × 10 <sup>-4</sup> × e <sup>0.3(fmet)</sup> × $\tau_{mod}$ <sup>e</sup><br>2.4 × 10 <sup>-4</sup> × e <sup>0.1(fmet)</sup> × $\tau_{mod}$ <sup>e</sup> | h <sup>-1</sup>                                                    |
| $\tau_{mod}$                              | Modifies microbial turnover rate                        | 0.8 < √NPP/100 < 1.2                                                                                                                                       | -                                                                  |
| $a_\tau$                                  | Tuning coefficient of $K_{mic}$                         | 1.0                                                                                                                                                        | -                                                                  |
| $f_{rp}$                                  | Fraction of $K_{mic}$ of $MIC_r$ partitioned to $SOC_p$ | min (1.0, 0.13 × e <sup>1.3(fclay)</sup> ) <sup>f</sup>                                                                                                    | -                                                                  |
| $f_{kp}$                                  | Fraction of $K_{mic}$ of $MIC_k$ partitioned to $SOC_p$ | min (1.0, 0.02 × e <sup>0.8(fclay)</sup> ) <sup>f</sup>                                                                                                    | -                                                                  |
| $f_{rc}$                                  | Fraction of $K_{mic}$ of $MIC_r$ partitioned to $SOC_c$ | min (1.0 - $f_{rp}$ , 1.06 × e <sup>-2.6(fmet)</sup> ) <sup>f</sup>                                                                                        | -                                                                  |
| $f_{kc}$                                  | Fraction of $K_{mic}$ of $MIC_k$ partitioned to $SOC_c$ | min (1.0 - $f_{kp}$ , 8.93 × e <sup>-2.6(fmet)</sup> ) <sup>f</sup>                                                                                        | -                                                                  |
| $f_{ra}$                                  | Fraction of $K_{mic}$ of $MIC_r$ partitioned to $SOC_a$ | 1.0 - $f_{rp}$ - $f_{rc}$                                                                                                                                  | -                                                                  |
| $f_{ka}$                                  | Fraction of $K_{mic}$ of $MIC_k$ partitioned to $SOC_a$ | 1.0 - $f_{kp}$ - $f_{kc}$                                                                                                                                  | -                                                                  |
| $\beta$                                   | Density-dependence exponent                             | Eq. 6                                                                                                                                                      | -                                                                  |
| <b>Protected carbon parameters</b>        |                                                         |                                                                                                                                                            |                                                                    |
| $D$                                       | Desorption rate from $SOC_p$ to $SOC_a$                 | Eq. 5                                                                                                                                                      | h <sup>-1</sup>                                                    |
| $KO$                                      | Further modifies $K_m$ for oxidation of $SOC_c$         | 4, 4 <sup>e</sup>                                                                                                                                          | -                                                                  |

| Parameter                         | Description                                                                                       | Value                     | Unit                                   |
|-----------------------------------|---------------------------------------------------------------------------------------------------|---------------------------|----------------------------------------|
| $k_d$                             | Tuning coefficient of the desorption rate                                                         | Eq. 5                     | -                                      |
| $K_{ads}$                         | The sorption rate of SOC <sub>p</sub>                                                             | Eq. 8                     | h <sup>-1</sup>                        |
| $k_{ba}$                          | The binding affinity (Eq. 8)                                                                      | 1~16 <sup>g</sup>         | (mg C·mg <sup>-3</sup> ) <sup>-1</sup> |
| $Q_{max}$                         | The maximum sorption capacity of SOC <sub>p</sub>                                                 | Eq. 9                     | mg C cm <sup>-3</sup>                  |
| <b>Biochar-related parameters</b> |                                                                                                   |                           |                                        |
| $f_{bp}$                          | Fraction of biochar carbon partitioned into SOC <sub>p</sub>                                      | 0.6                       | -                                      |
| $f_{ba}$                          | Fraction of biochar carbon partitioned into SOC <sub>a</sub>                                      | 0.03-0.3 <sup>h</sup>     | -                                      |
| $f_{bc}$                          | Fraction of biochar carbon partitioned into SOC <sub>c</sub>                                      | 1.0 - $f_{bp}$ - $f_{ba}$ | -                                      |
| $f_{loss}$                        | Biochar fraction loss during addition                                                             | 0.02 <sup>h</sup>         | -                                      |
| $f_d$                             | Coefficients for adjusting the desorption rate of SOC <sub>p</sub> with biochar addition (Eq. 15) | -0.15 ~0.15 <sup>h</sup>  | ha t <sup>-1</sup> C                   |
| $f_v$                             | Coefficients for adjusting the microbial decomposition velocity with biochar addition (Eq. 16)    | -0.15 ~0.15 <sup>h</sup>  | ha t <sup>-1</sup> C                   |

<sup>a</sup> From observations in German et al. (2012), as used in Wieder et al. (2014, 2015).

<sup>b</sup> For LIT<sub>m</sub>, LIT<sub>s</sub>, and SOC<sub>a</sub>, fluxes entering MIC<sub>r</sub>, respectively.

5 <sup>c</sup> For LIT<sub>m</sub>, LIT<sub>s</sub>, and SOC<sub>a</sub>, fluxes entering MIC<sub>k</sub>, respectively.

<sup>d</sup> 0.5 is the MGE of C fluxes from LIT<sub>m</sub> and SOC<sub>a</sub> to MIC<sub>r</sub>, 0.25 is for C flux from LIT<sub>s</sub> to MIC<sub>r</sub>, 0.7 is for fluxes from LIT<sub>s</sub> and SOC<sub>a</sub> to MIC<sub>k</sub>, 0.35 is for C flux from LIT<sub>m</sub> to MIC<sub>k</sub>.

<sup>e</sup> For MIC<sub>r</sub> and MIC<sub>k</sub>, respectively.

<sup>f</sup> Values from Zhang et al. (2020).

10 <sup>g</sup> Values from Wang et al. (2020).

<sup>h</sup> Ranges from Archontoulis et al. (2016).

**Table S2** Definitions and values of modified parameters used in default MIMICS.

| Parameters <sup>d</sup> | Description                             | Original values <sup>a</sup> | Modified values   |
|-------------------------|-----------------------------------------|------------------------------|-------------------|
| cn_leaf                 | The ratio of carbon to nitrogen in leaf | 30                           | 25 <sup>b</sup>   |
| cn_root                 | The ratio of carbon to nitrogen in root | 75                           | 45 <sup>b</sup>   |
| cn_stem                 | The ratio of carbon to nitrogen in stem | 200                          | 50 <sup>b</sup>   |
| lig_c_leaf              | The ratio of lignin to carbon in leaf   | 0.1                          | 0.12 <sup>b</sup> |
| lig_c_root              | The ratio of lignin to carbon in root   | 0.1                          | 0.40 <sup>b</sup> |
| lig_c_stem              | The ratio of lignin to carbon in stem   | 0.15                         | 0.15 <sup>b</sup> |
| HI                      | Harvest index                           | -                            | 0.45 <sup>c</sup> |

15 <sup>a</sup> Values based on Zhang et al. (2020).

<sup>b</sup> Estimated values from Abiven et al. (2005).

<sup>c</sup> Value from Hicke and Lobell (2004).

<sup>d</sup> These parameters were assumed unchanged with biochar addition.

20 **Table S3** Prior parameter values, optimized values and ranges in the parameter optimization for various MIMICS versions.

| Datasets                | Model                                      | Parameter | Prior value | Optimized value                              | Range <sup>c</sup> | Units                |
|-------------------------|--------------------------------------------|-----------|-------------|----------------------------------------------|--------------------|----------------------|
| MIMICS                  | MIMICS-def                                 | $a_v$     | 10          | 13.95                                        | [0,30]             | -                    |
|                         |                                            | $a_k$     | 5           | 16.36                                        | [0,20]             | -                    |
|                         |                                            | $k_d$     | 0.5         | 1.73                                         | [0,3]              | -                    |
|                         | MIMICS-T                                   | $a_v$     | 10          | 8.34                                         | [0,30]             | -                    |
|                         |                                            | $a_k$     | 5           | 12.52                                        | [0,20]             | -                    |
|                         |                                            | $k_d$     | 0.5         | 2.57                                         | [0,3]              | -                    |
|                         |                                            | $\beta$   | 1           | 1.15                                         | [0,2]              | -                    |
|                         | MIMICS-TS                                  | $a_v$     | 10          | 9.13                                         | [0,30]             | -                    |
|                         |                                            | $a_k$     | 5           | 17.72                                        | [0,20]             | -                    |
|                         |                                            | $k_d$     | 0.5         | 2.15                                         | [0,3]              | -                    |
|                         |                                            | $\beta$   | 1           | 1.35                                         | [0,2]              | -                    |
|                         |                                            | $k_{ba}$  | 6           | 8.60                                         | [1,16]             | -                    |
|                         |                                            | $c_1$     | 0.3         | 0.27                                         | [0,0.8]            | -                    |
|                         |                                            | $c_2$     | 3.0         | 2.16                                         | [0,5]              | -                    |
|                         | MIMICS-TSM <sub>a</sub>                    | $a_v$     | 10          | 8.50                                         | [0,30]             | -                    |
|                         |                                            | $a_k$     | 5           | 15.22                                        | [0,20]             | -                    |
|                         |                                            | $k_d$     | 0.5         | 2.03                                         | [0,3]              | -                    |
|                         |                                            | $\beta$   | 1           | 1.33                                         | [0,2]              | -                    |
|                         |                                            | $k_{ba}$  | 6           | 8.38                                         | [1,16]             | -                    |
|                         |                                            | $c_1$     | 0.3         | 0.42                                         | [0,0.8]            | -                    |
|                         |                                            | $c_2$     | 3           | 2.61                                         | [0,5]              | -                    |
|                         | MIMICS-TSM <sub>b</sub>                    | $a_v$     | 10          | 9.94                                         | [0,30]             | -                    |
|                         |                                            | $a_k$     | 5           | 19.42                                        | [0,20]             | -                    |
|                         |                                            | $k_d$     | 0.5         | 1.97                                         | [0,3]              | -                    |
|                         |                                            | $\beta$   | 1           | 1.36                                         | [0,2]              | -                    |
|                         |                                            | $k_{ba}$  | 6           | 6.51                                         | [1,16]             | -                    |
|                         |                                            | $c_1$     | 0.3         | 0.39                                         | [0,0.8]            | -                    |
|                         |                                            | $c_2$     | 3           | 1.55                                         | [0,5]              | -                    |
| MIMICS-TSM <sub>c</sub> | $a_v$                                      | 10        | 10.37       | [0,30]                                       | -                  |                      |
|                         | $a_k$                                      | 5         | 17.12       | [0,20]                                       | -                  |                      |
|                         | $k_d$                                      | 0.5       | 1.63        | [0,3]                                        | -                  |                      |
|                         | $\beta$                                    | 1         | 1.21        | [0,2]                                        | -                  |                      |
|                         | $k_{ba}$                                   | 6         | 9.61        | [1,16]                                       | -                  |                      |
|                         | $c_1$                                      | 0.3       | 0.28        | [0,0.8]                                      | -                  |                      |
|                         | $c_2$                                      | 3         | 2.24        | [0,5]                                        | -                  |                      |
| MIMICS <sub>T</sub> -BC | MIMICS <sub>T</sub> -BC <sub>def</sub>     | none      | none        | none                                         | none               | none                 |
|                         | MIMICS <sub>T</sub> -BC <sub>D</sub>       | $f_d$     | -0.002      | -0.0084 <sup>a</sup> (-0.0131 <sup>b</sup> ) | [-0.15,0.15]       | ha t <sup>-1</sup> C |
|                         | MIMICS <sub>T</sub> -BC <sub>DV</sub>      | $f_d$     | -0.002      | 0.0168 <sup>a</sup> (-0.0125 <sup>b</sup> )  | [-0.15,0.15]       | ha t <sup>-1</sup> C |
|                         |                                            | $f_v$     | 0.05        | -0.0086 <sup>a</sup> (-0.0149 <sup>b</sup> ) | [-0.15,0.15]       | ha t <sup>-1</sup> C |
|                         | MIMICS <sub>T</sub> -BC <sub>DV-SOCa</sub> | $f_d$     | -0.002      | -0.0096 <sup>a</sup> (-0.0030 <sup>b</sup> ) | [-0.15,0.15]       | ha t <sup>-1</sup> C |

|                           |                                             |       |        |                                              |              |                      |
|---------------------------|---------------------------------------------|-------|--------|----------------------------------------------|--------------|----------------------|
|                           |                                             | $f_v$ | 0.05   | 0.0082 <sup>a</sup> (-0.0257 <sup>b</sup> )  | [-0.15,0.15] | ha t <sup>-1</sup> C |
| MIMICS <sub>TSMb-BC</sub> | MIMICS <sub>TSMb-BC<sub>def</sub></sub>     | none  | none   | none                                         | none         | none                 |
|                           | MIMICS <sub>TSMb-BC<sub>D</sub></sub>       | $f_d$ | -0.002 | -0.0121 <sup>a</sup> (-0.0122 <sup>b</sup> ) | [-0.15,0.15] | ha t <sup>-1</sup> C |
|                           | MIMICS <sub>TSMb-BC<sub>DV</sub></sub>      | $f_d$ | -0.002 | 0.0020 <sup>a</sup> (0.0934 <sup>b</sup> )   | [-0.15,0.15] | ha t <sup>-1</sup> C |
|                           |                                             | $f_v$ | 0.05   | -0.0092 <sup>a</sup> (-0.0253 <sup>b</sup> ) | [-0.15,0.15] | ha t <sup>-1</sup> C |
|                           | MIMICS <sub>TSMb-BC<sub>DV-SOCa</sub></sub> | $f_d$ | -0.002 | 0.0020 <sup>a</sup> (0.0107 <sup>b</sup> )   | [-0.15,0.15] | ha t <sup>-1</sup> C |
|                           |                                             | $f_v$ | 0.05   | -0.0098 <sup>a</sup> (-0.0260 <sup>b</sup> ) | [-0.15,0.15] | ha t <sup>-1</sup> C |

<sup>a</sup> The optimized parameter values using the short-term SOC data.

<sup>b</sup> The optimized parameter values using the long-term (extended to 8 yr) SOC data.

<sup>c</sup> The prescribed parameter ranges of  $a_v$ ,  $a_k$ ,  $k_d$ ,  $\beta$  are from Zhang et al. (2020).  $k_{ba}$  is from Wang et al. (2020).  $c_1$  and  $c_2$  are estimated from Mayes et al. (2012).  $f_d$  and  $f_v$  are from Archontoulis et al. (2016).

30

35

40

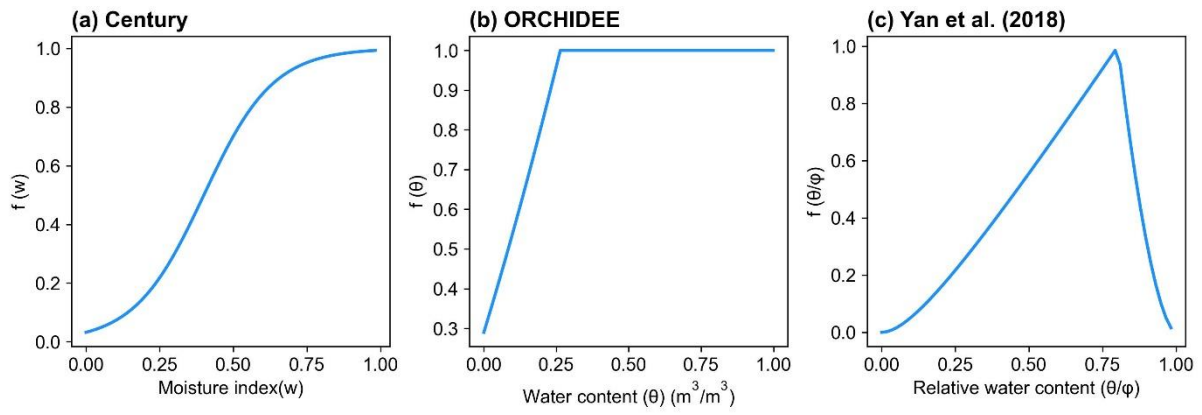

**Fig. S1** Soil moisture functions from (a) the Century model (Parton et al., 2000), (b) the ORCHIDEE-SOM model (Camino-Serrano et al., 2018) and (c) the mechanism-based soil moisture function from Yan et al. (2018).  $w$  is soil moisture indicator (AI, i.e., precipitation/potential evapotranspiration).  $\theta$  is soil water content,  $\phi$  is soil porosity, and  $\theta/\phi$  is relative water content.

50

55

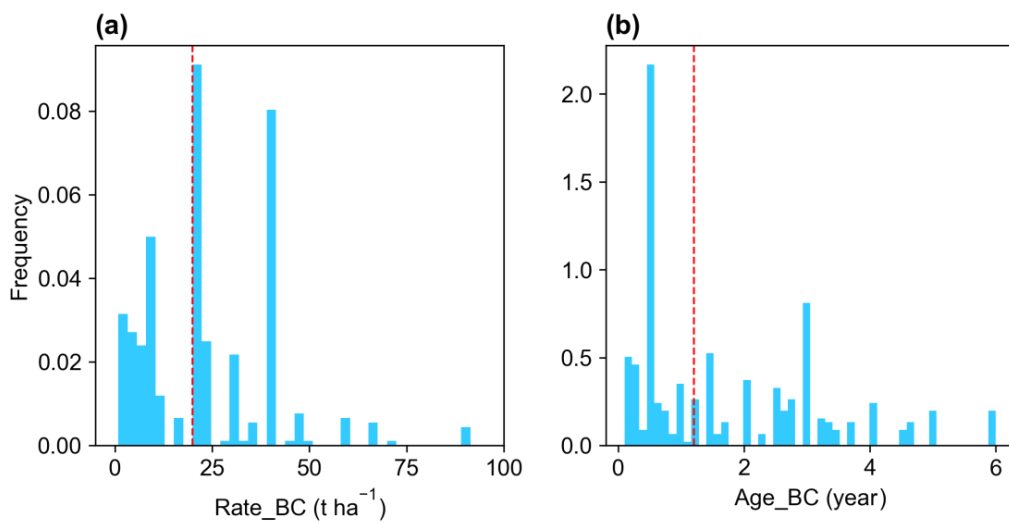

**Fig. S2** The frequency distribution of (a) biochar application rates (Rate\_BC) and (b) biochar addition periods (Age\_BC). Red dotted lines indicate the median values.

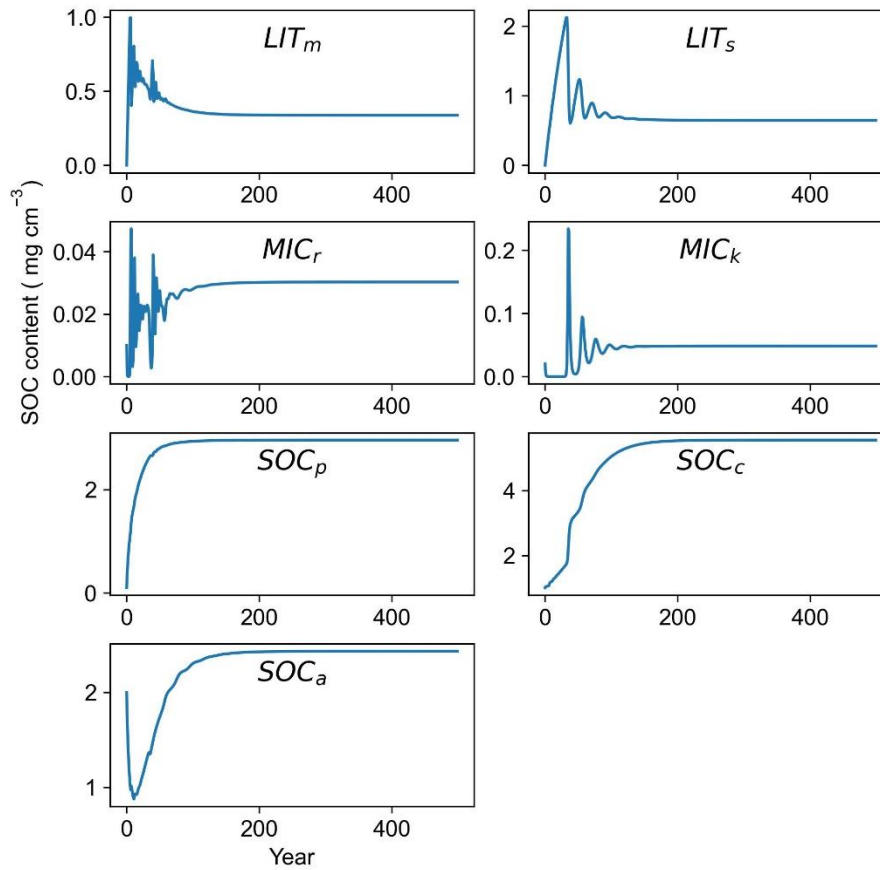

60 **Fig. S3** Temporal changes of seven SOC pools from a simulation of the MIMICS-TSM<sub>b</sub> version for 500 years using one random site (Lat, Lon =28.1°N, 113.2°E) as an example.

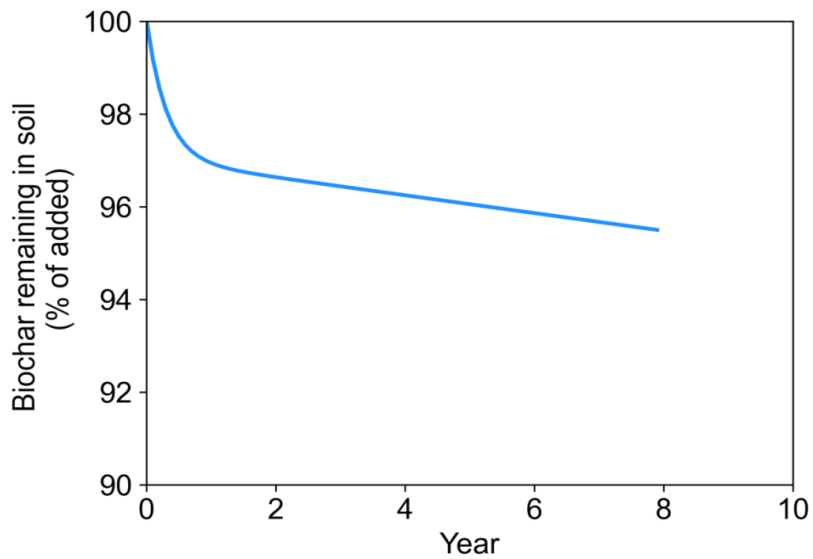

65 **Fig. S4** The biochar decomposition curve fitted with experimental data from Wang et al. (2016) using a double first-order exponential decay model ( $BC_{remain\%} = 3.02 \times e^{(-3.24 \times age_{bc})} + 97.02 \times e^{(-0.002 \times age_{bc})}$ ).

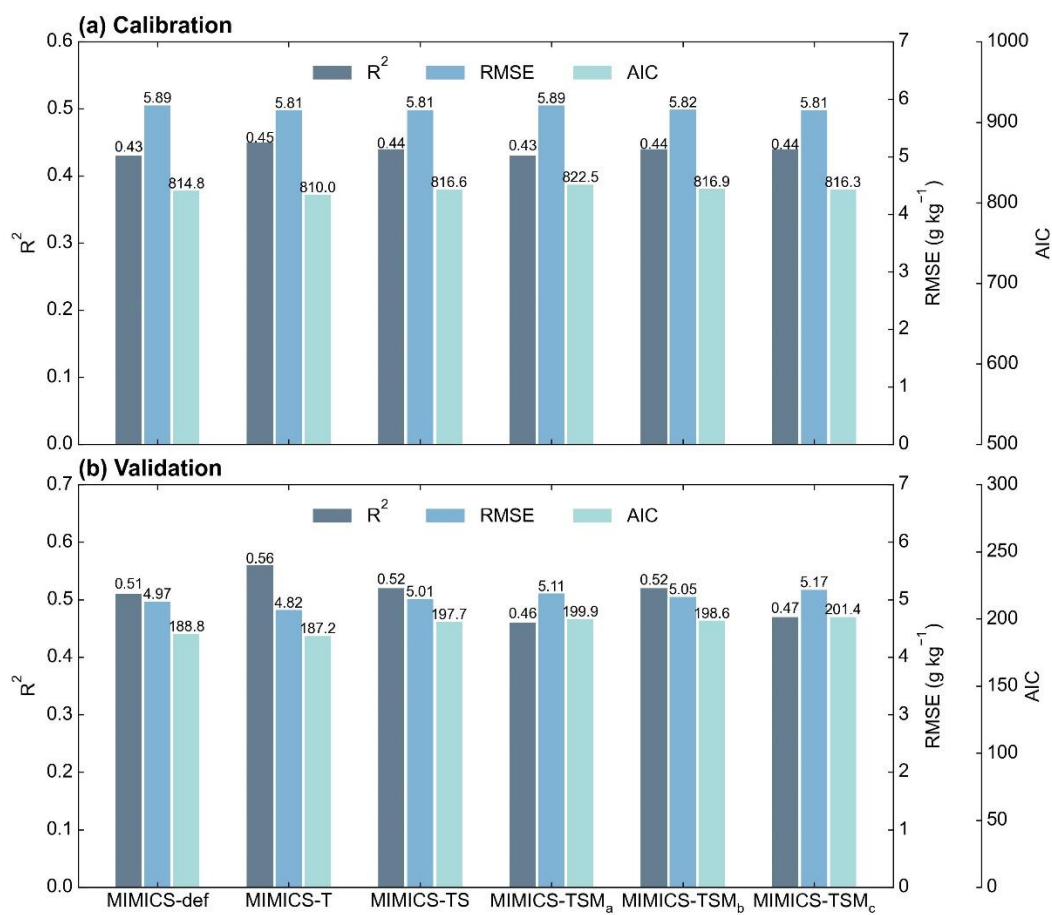

**Fig. S5** Comparison of  $R^2$ , RMSE and AIC of all MIMICS versions in model calibration (a) and validation (b).

70

75



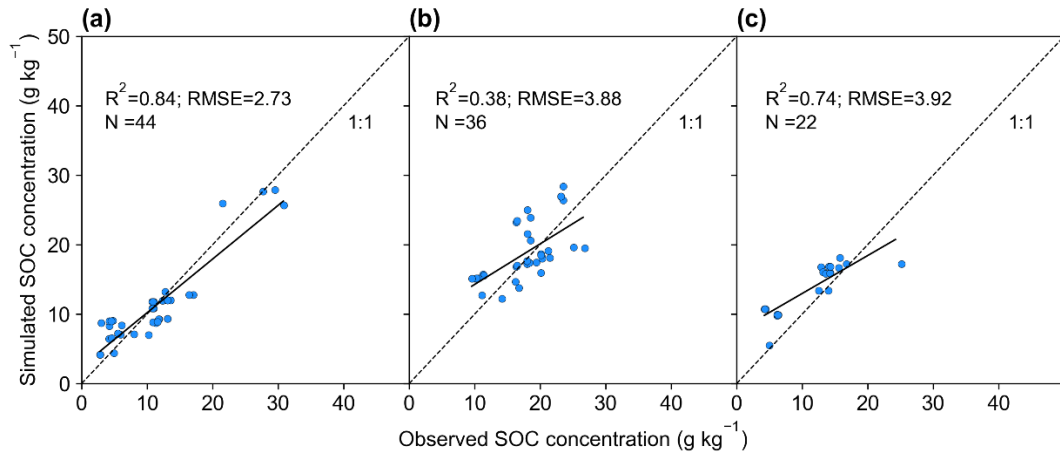

80 **Fig. S6** Relationship between observed and simulated SOC concentrations by MIMICS-TSM<sub>b</sub> for (a) maize, (b) rice and (c) wheat. The unit of RMSE is g kg<sup>-1</sup>.

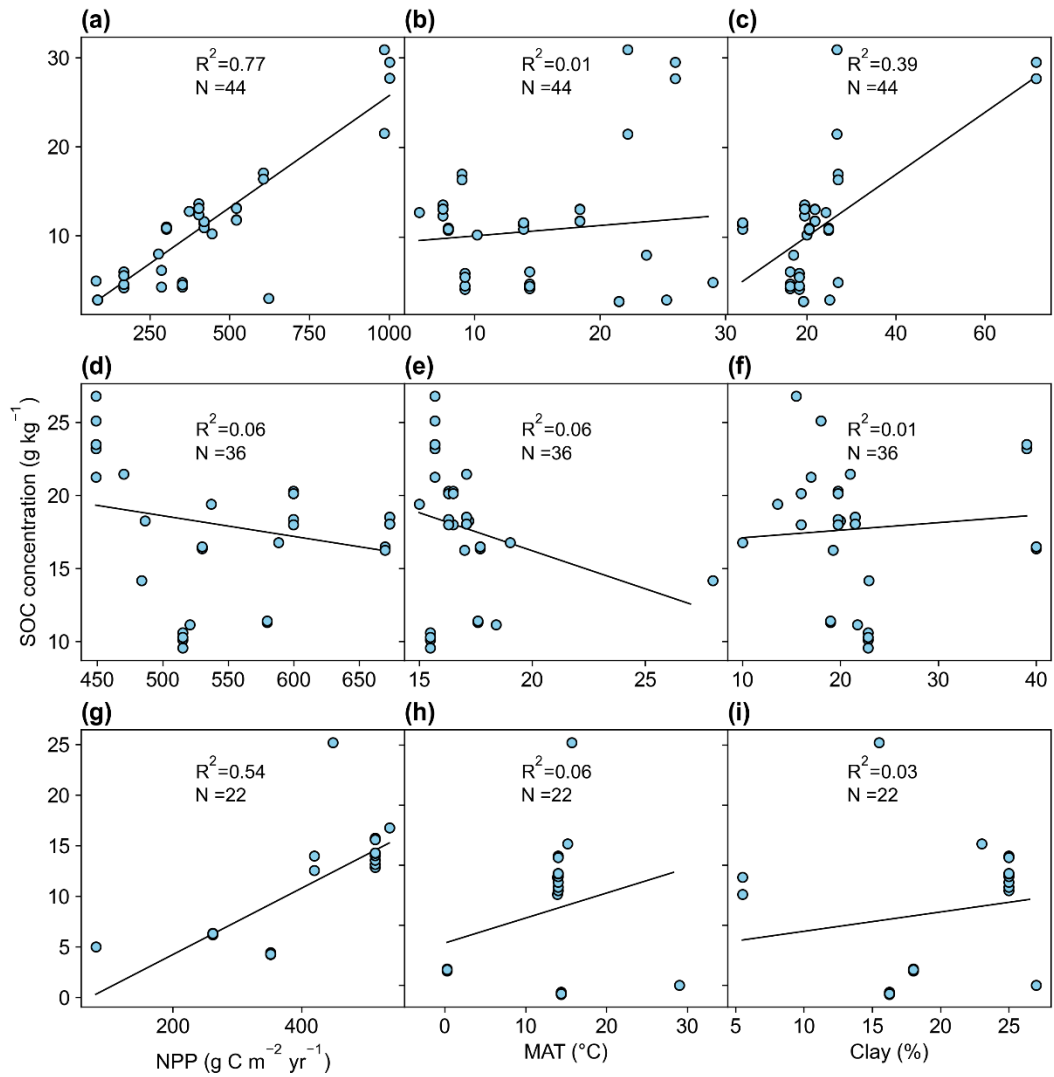

85 **Fig. S7** Correlation between SOC concentrations with NPP, MAT and Clay for maize (a-c), rice (d-f) and wheat (g-i).

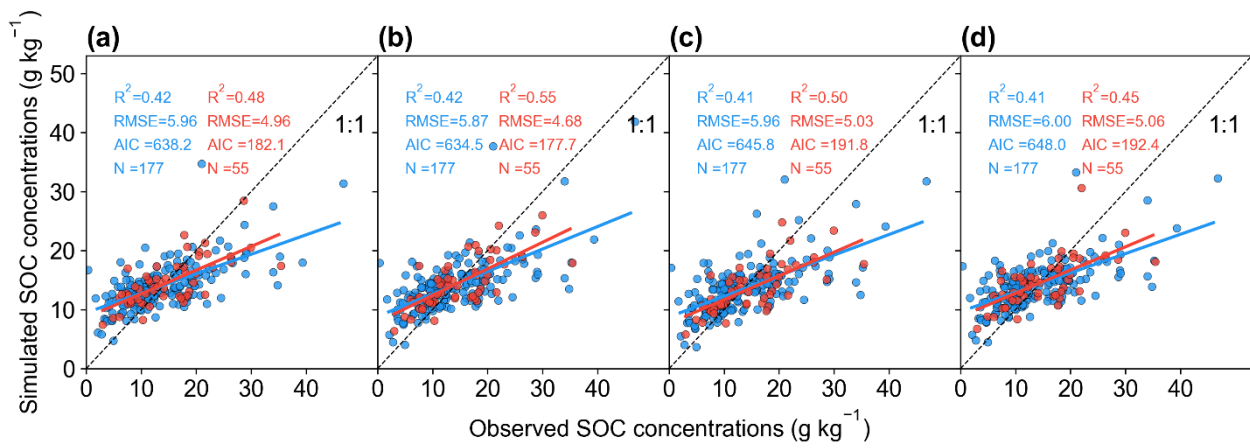

**Fig. S8** Relationships between observed and simulated SOC concentrations aggregated within each  $0.5^\circ$  grid cell by MIMICS-def (a), MIMICS-T (b), MIMICS-TS (c) and MIMICS-TSM<sub>b</sub> (d). The unit of RMSE is  $\text{g kg}^{-1}$ . Blue and red dots represent observation sites for model calibration (80% sites) and validation (20% sites), respectively.

90

95

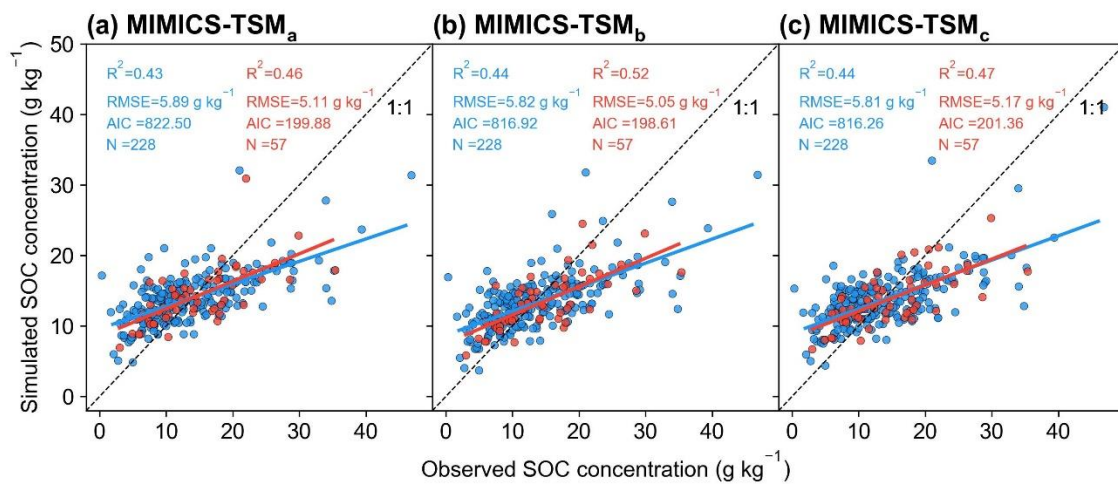

**Fig. S9** Comparison between the observed and simulated SOC concentrations by (a) MIMICS-TSM<sub>a</sub>, (b) MIMICS-TSM<sub>b</sub> and (c) MIMICS-TSM<sub>c</sub>. Blue and red dots represent observation sites for model calibration (80% sites) and validation (20% sites), respectively.

100

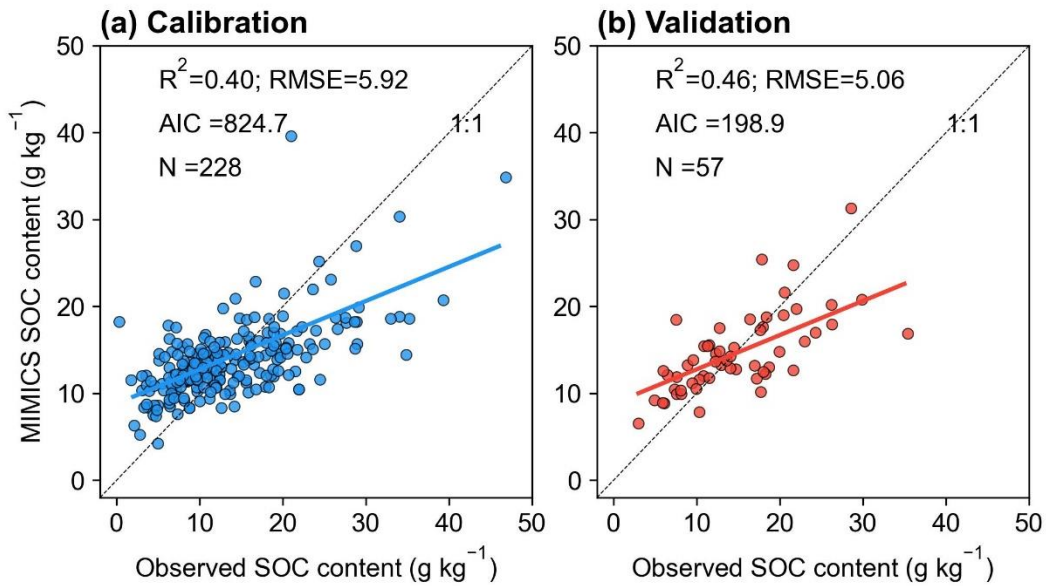

105

**Fig. S10** Relationships between observed and simulated SOC concentrations by MIMICS-TSM<sub>b</sub> for (a) calibration and (b) validation assuming that the soil moist factor ( $f_{m2}(\theta)$ , Eq. 11) were multiplied by  $V_{max}$  and microbial turnover ( $\tau$ ) of MIC<sub>r</sub> and MIC<sub>k</sub>, instead of by  $V_{max}$  and  $K_m$  in **Section 2.1.4**.

110

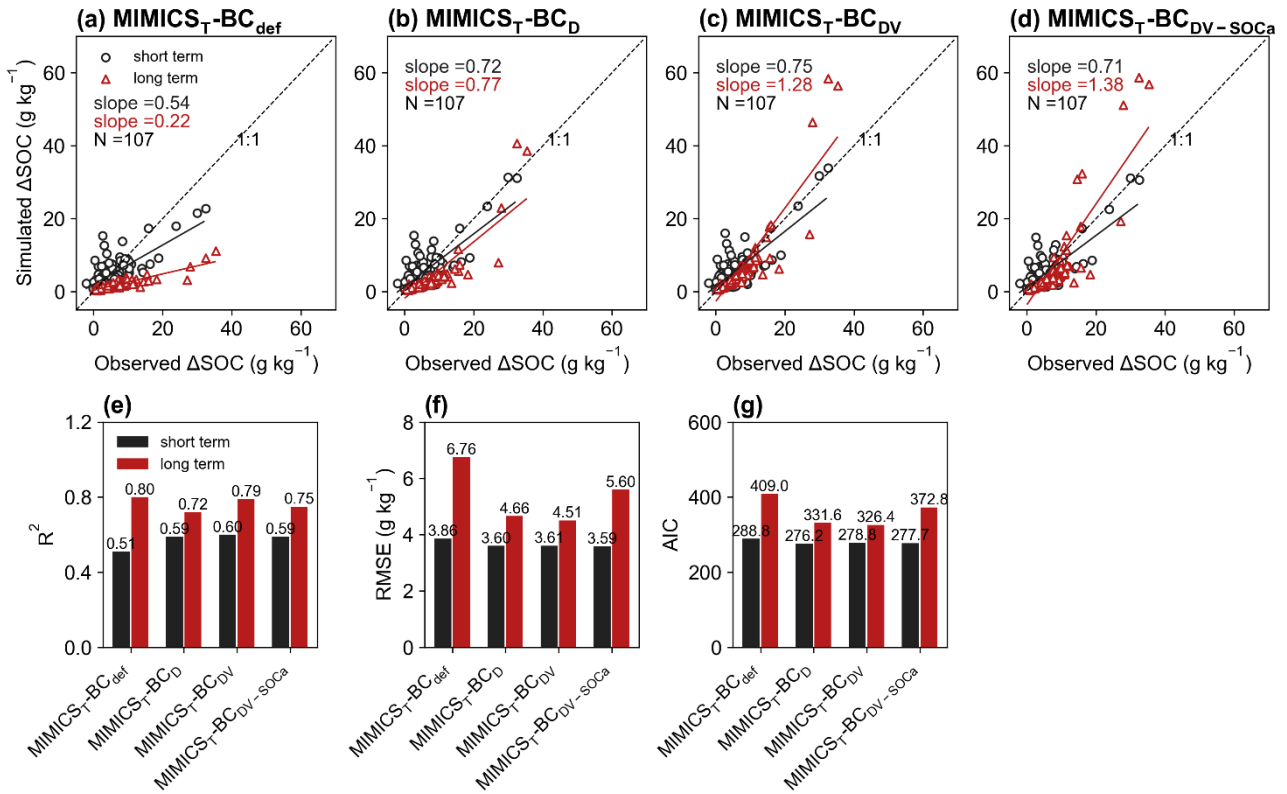

**Fig. S11** As Fig. 6 but for model calibration instead of validation.

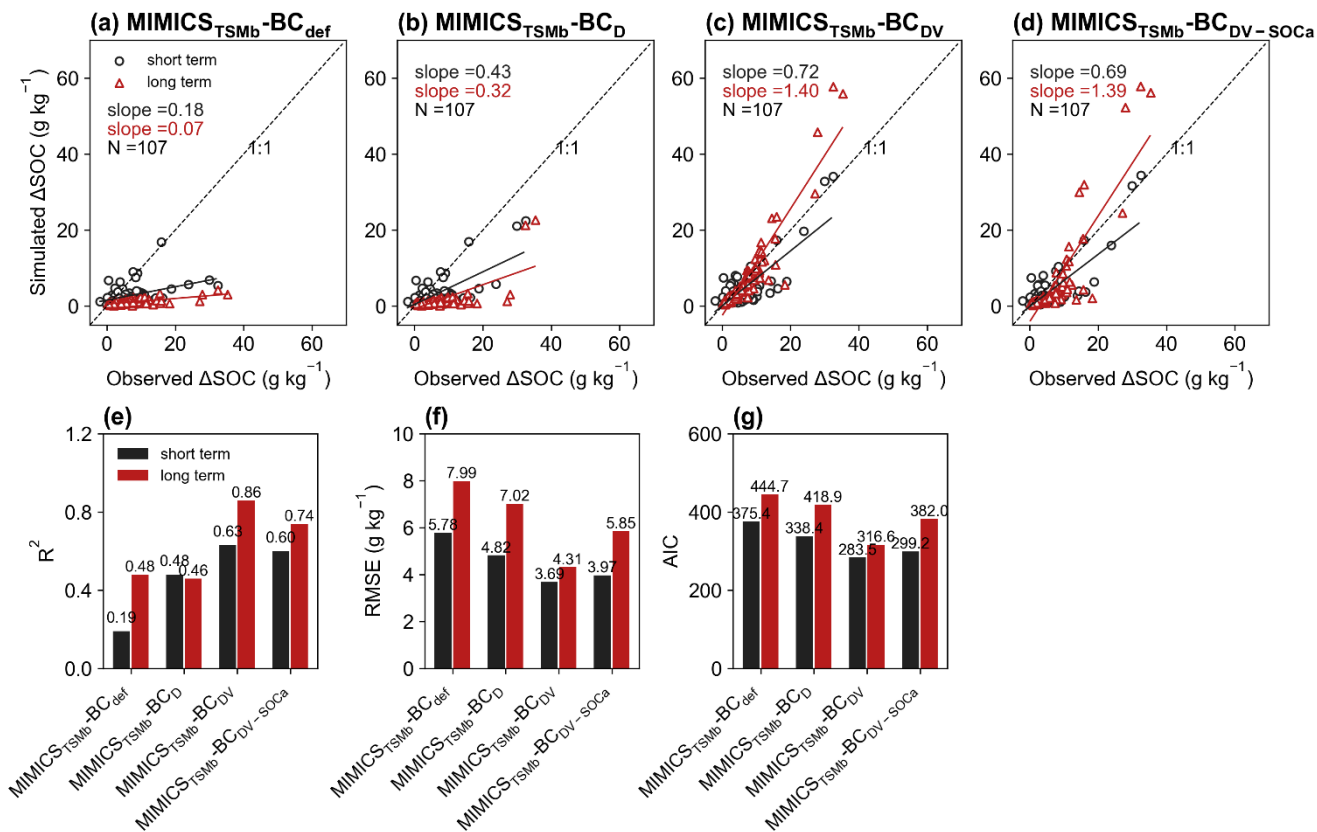

115 **Fig. S12** As Fig. 7 but for model calibration instead of validation.

120

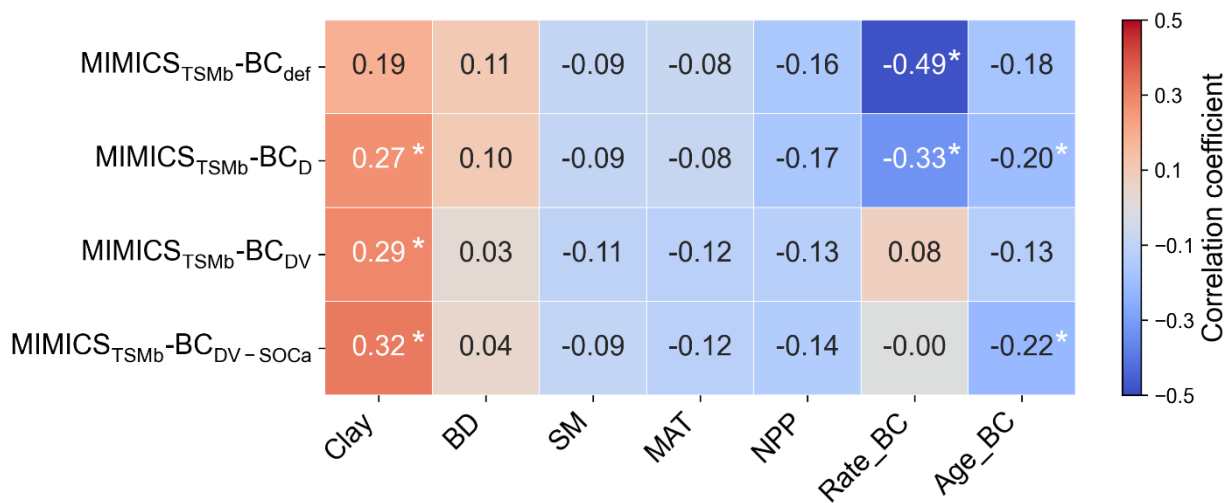

**Fig. S13** As Fig. 8 but for short-term SOC changes with biochar addition.

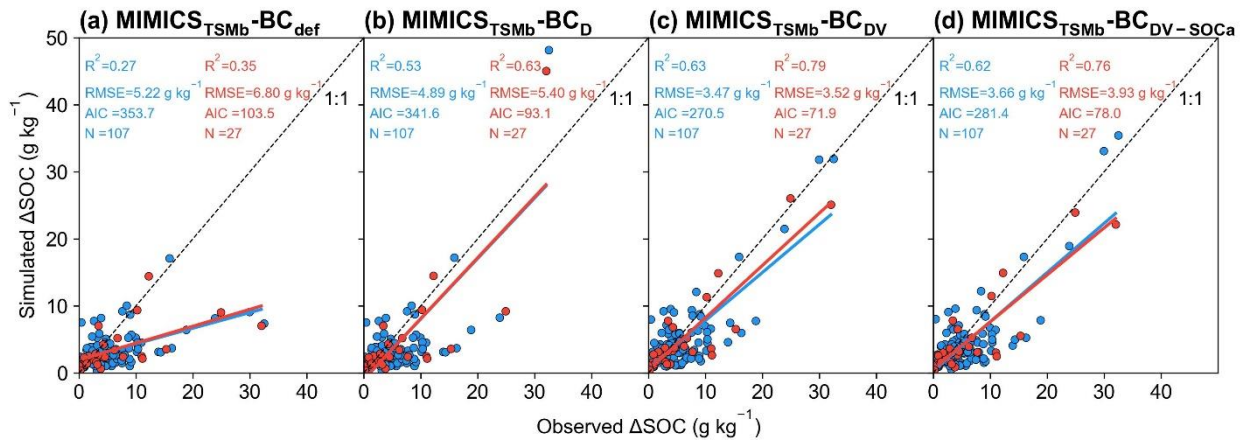

125

**Fig. S14** Relationships of short-term SOC changes after biochar addition between observations and models with (a) MIMICS<sub>TSMb-BC<sub>def</sub></sub>, (b) MIMICS<sub>TSMb-BC<sub>D</sub></sub>, (c) MIMICS<sub>TSMb-BC<sub>DV</sub></sub> and (d) MIMICS<sub>TSMb-BC<sub>DV-SOCa</sub></sub>. ( $f_{ba}=2\%$ ). Blue and red dots represent observation sites for model calibration (80% sites) and validation (20% sites), respectively.

130

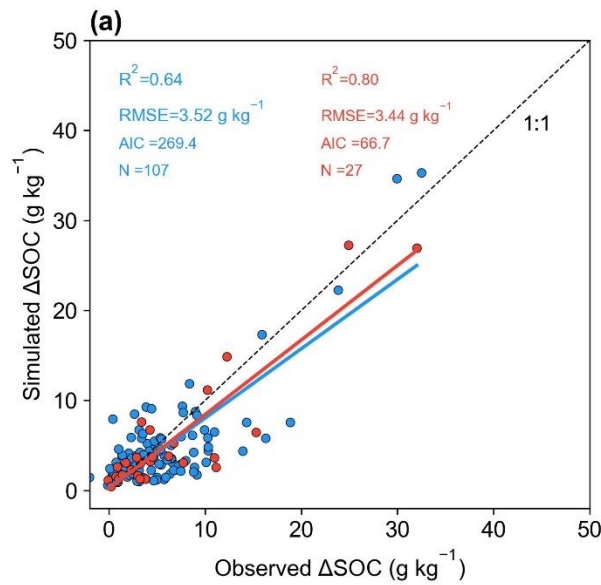

135

**Fig. S15** Relationships of short-term SOC changes after biochar addition between observations and models simulated with MIMICS<sub>TSMb-BC<sub>DV</sub></sub> version with four parameters optimized (optimized values:  $f_d=0.1123$ ,  $f_v=-0.0088$ ,  $f_{bp}=0.581$  and  $f_{ba}=0.0816$ ). Blue and red dots represent observation sites for model calibration (80% sites) and validation (20% sites), respectively.

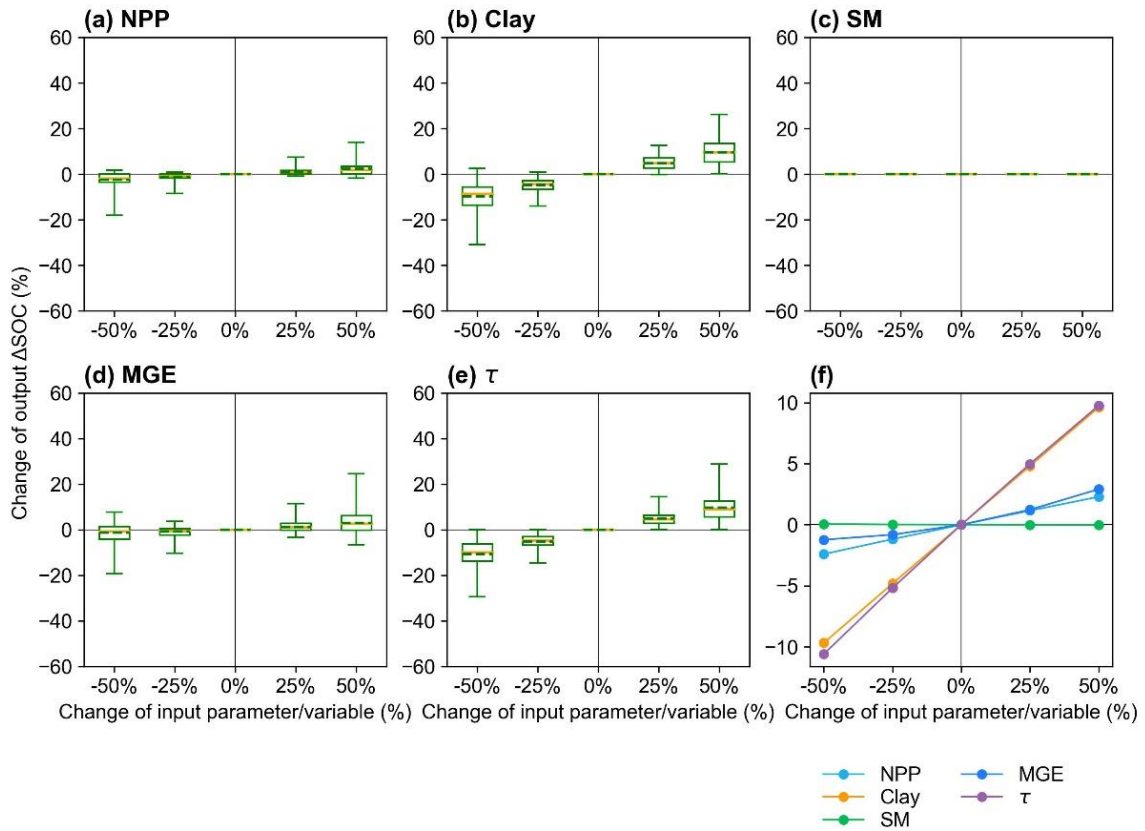

140

**Fig. S16** Sensitivity analysis of MIMICS<sub>TSMb-BCDV</sub> model input variables of (a) NPP, (b) Clay, (c) SM and parameters of (d) MGE (microbial growth efficiency, Fig. 1) and (e)  $\tau$  (microbial biomass turnover, Fig. 1). The yellow line and green dotted line in boxplot are median and mean values of output variable change (i.e., change of  $\Delta$ SOC, Eq. 19). The means of  $\Delta$ SOC changes with perturbations in calibrated sites are plot in (f).

145

150

155

## References

- 160 Abiven, S., Recous, S., Reyes, V., and Oliver, R.: Mineralisation of C and N from root, stem and leaf residues in soil and role of their biochemical quality, *Biology and Fertility of Soils*, 42, 119-128, 10.1007/s00374-005-0006-0, 2005.
- Archontoulis, S. V., Huber, I., Miguez, F. E., Thorburn, P. J., Rogovska, N., and Laird, D. A.: A model for mechanistic and system assessments of biochar effects on soils and crops and trade - offs, *GCB Bioenergy*, 8, 1028-1045, 10.1111/gcbb.12314, 2016.
- 165 Camino-Serrano, M., Guenet, B., Luysaert, S., Ciais, P., Bastrikov, V., De Vos, B., Gielen, B., Gleixner, G., Jornet-Puig, A., Kaiser, K., Kothawala, D., Lauerwald, R., Peñuelas, J., Schrumpf, M., Vicca, S., Vuichard, N., Walmsley, D., and Janssens, I. A.: ORCHIDEE-SOM: modeling soil organic carbon (SOC) and dissolved organic carbon (DOC) dynamics along vertical soil profiles in Europe, *Geoscientific Model Development*, 11, 937-957, 10.5194/gmd-11-937-2018, 2018.
- 170 German, D. P., Marcelo, K. R., Stone, M. M., and Allison, S. D.: The Michaelis - Menten kinetics of soil extracellular enzymes in response to temperature: a cross - latitudinal study, *Global Change Biology*, 18, 1468-1479, 2012.
- Hicke, J. A. and Lobell, D. B.: Spatiotemporal patterns of cropland area and net primary production in the central United States estimated from USDA agricultural information, *Geophysical Research Letters*, 31, 2004.
- Mayes, M. A., Heal, K. R., Brandt, C. C., Phillips, J. R., and Jardine, P. M.: Relation between Soil Order and Sorption of Dissolved Organic Carbon in Temperate Subsoils, *Soil Science Society of America Journal*, 76, 1027-1037, 10.2136/sssaj2011.0340, 2012.
- 175 Parton, W. J., Morgan, J. A., Kelly, R. H., and Ojima, D.: Modeling soil C responses to environmental change in grassland systems[M] The potential of US grazing lands to sequester carbon and mitigate the greenhouse effect, 2000.
- Wang, G., Huang, W., Zhou, G., Mayes, M. A., and Zhou, J.: Modeling the processes of soil moisture in regulating microbial and carbon-nitrogen cycling, *Journal of Hydrology*, 585, 10.1016/j.jhydrol.2020.124777, 2020.
- 180 Wang, J., Xiong, Z., and Kuzyakov, Y.: Biochar stability in soil: meta-analysis of decomposition and priming effects, *Global Change Biology Bioenergy*, 8, 512-523, 10.1111/gcbb.12266, 2016.
- Wieder, W. R., Grandy, A. S., Kallenbach, C. M., and Bonan, G. B.: Integrating microbial physiology and physio-chemical principles in soils with the MIMicrobial-MINeral Carbon Stabilization (MIMICS) model, *Biogeosciences*, 11, 3899-3917, 10.5194/bg-11-3899-2014, 2014.
- 185 Wieder, W. R., Grandy, A. S., Kallenbach, C. M., Taylor, P. G., and Bonan, G. B.: Representing life in the Earth system with soil microbial functional traits in the MIMICS model, *Geoscientific Model Development*, 8, 1789-1808, 10.5194/gmd-8-1789-2015, 2015.
- Yan, Z., Bond-Lamberty, B., Todd-Brown, K. E., Bailey, V. L., Li, S., Liu, C., and Liu, C.: A moisture function of soil heterotrophic respiration that incorporates microscale processes, *Nat Commun*, 9, 2562, 10.1038/s41467-018-04971-6, 2018.
- 190 Zhang, H., Goll, D. S., Wang, Y. P., Ciais, P., Wieder, W. R., Abramoff, R., Huang, Y., Guenet, B., Prescher, A. K., Viscarra Rossel, R. A., Barre, P., Chenu, C., Zhou, G., and Tang, X.: Microbial dynamics and soil physicochemical properties explain large-scale variations in soil organic carbon, *Glob Chang Biol*, 10.1111/gcb.14994, 2020.
